# Supplementary material
Source: PubMed Central journal article supplement (PMC11605697)
Supplement: sj-pdf-1-jcb-10.1177_0271678X241302937.pdf [file sj-pdf-1-jcb-10.1177_0271678X241302937.pdf]

## Supplemental Information

### Neurochemical Characterization of 5-HT<sub>2A</sub>R Partial Agonists with Simultaneous PET-MRI

Frederick A. Bagdasarian, PhD,<sup>1,\*</sup> Kristian Larsen, MSc,<sup>2,3,\*</sup> Hong Ping Deng, MSc MD<sup>1</sup>, Patrick M. Fisher, PhD,<sup>2,4</sup> Joseph B. Mandeville, PhD,<sup>1</sup> Christin Y. Sander, PhD,<sup>1</sup> Hsiao-Ying Wey, PhD,<sup>1,5#</sup> Hanne D. Hansen, PhD,<sup>1,2#</sup>

<sup>1</sup>Athinoula A. Martinos Center for Biomedical Imaging, Department of Radiology, Massachusetts General Hospital, Harvard Medical School, Charlestown, USA

<sup>2</sup>Neurobiology Research Unit, Copenhagen University Hospital, Rigshospitalet, Copenhagen, Denmark

<sup>3</sup>Department of Medicine, Faculty of Health and Medical Sciences, University of Copenhagen, Denmark

<sup>4</sup>Department of Drug Design and Pharmacology, University of Copenhagen, Denmark

<sup>5</sup>Center for the Neuroscience of Psychedelics, Department of Psychiatry, Massachusetts General Hospital, Harvard Medical School, Charlestown, USA

\* Equal contributing authors

### phMRI Data Processing

Gamma fits were conducted for each NHP on a case-by-case basis using open-source imaging software developed at the Martinos Center for Biomedical Imaging, Massachusetts General Hospital (<https://www.nitrc.org/projects/jip>). Specifically, pre-processed fMRI signals were visualized to determine the effective  $\tau$  values; time from the drug-injection to peak signal changes. The  $\alpha$  were determined iteratively in order to maximize fit shape and correspondence to the observed signals. For psilocybin and lisuride, this was performed by fitting the first peak signal change ( $\gamma_1$ ), followed by the second peak signal change ( $\gamma_2$ ), where the final signal model is a linear combination of both functions. Because 25CN-NBOH only had one major peak change induced by drug injection corresponding to increased CBV, this is noted solely as  $\gamma_2$  for consistency. After successful fitting, absolute signal values were normalized as percentages relative to the pre-drug signal and by removal of signal drift. CBV profiles shown in **Figure 3** and **Figure S5** are the result of this processing averaged between respective drug groups and doses.

|      | Baseline  | Psilocybin    |               |               | Lisuride     | 25CN-NBOH     |
|------|-----------|---------------|---------------|---------------|--------------|---------------|
|      | No Drug   | 30 $\mu$ g/kg | 60 $\mu$ g/kg | 90 $\mu$ g/kg | 5 $\mu$ g/kg | 30 $\mu$ g/kg |
| NHP1 | <b>XX</b> | <b>X</b>      | <b>X</b>      | <b>X</b>      | <b>X</b>     | <b>XX</b>     |
| NHP2 | <b>XX</b> | <b>X</b>      | <b>X</b>      | <b>X</b>      | <b>X</b>     | <b>X</b>      |
| NHP3 |           |               | <b>X</b>      |               |              |               |

**Table S1:** Summary of PET/MRI experimental conditions for each NHP dataset. **X**: PET and MRI; **XX**: PET only; **X**: MRI only.

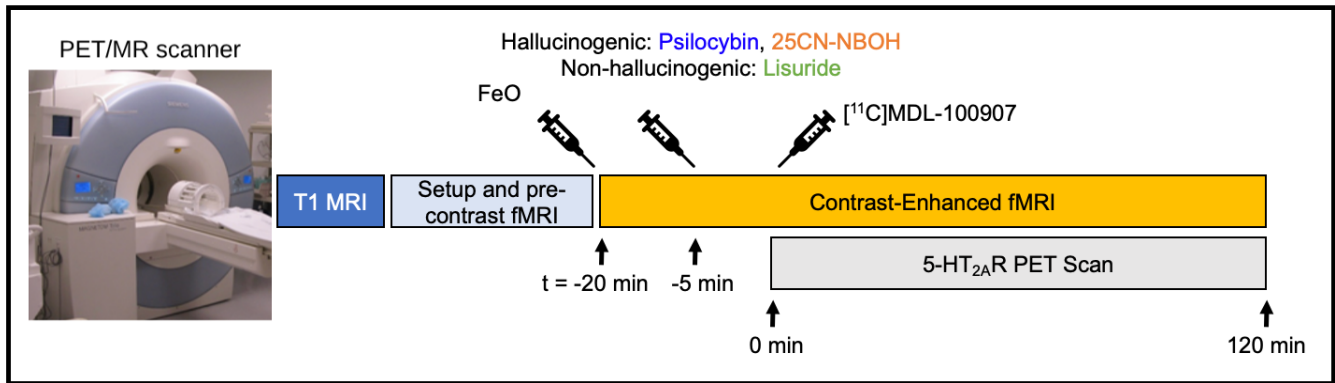

**Figure S1:** Experimental schematic of the PET/MR scanner and imaging protocol. T1: anatomical images used in neuroimaging registrations to brain templates. FeO: Iron oxide particles (MION) used to enhance fMRI signals.

## Individual NHP Whole Brain CBV Change: Lisuride

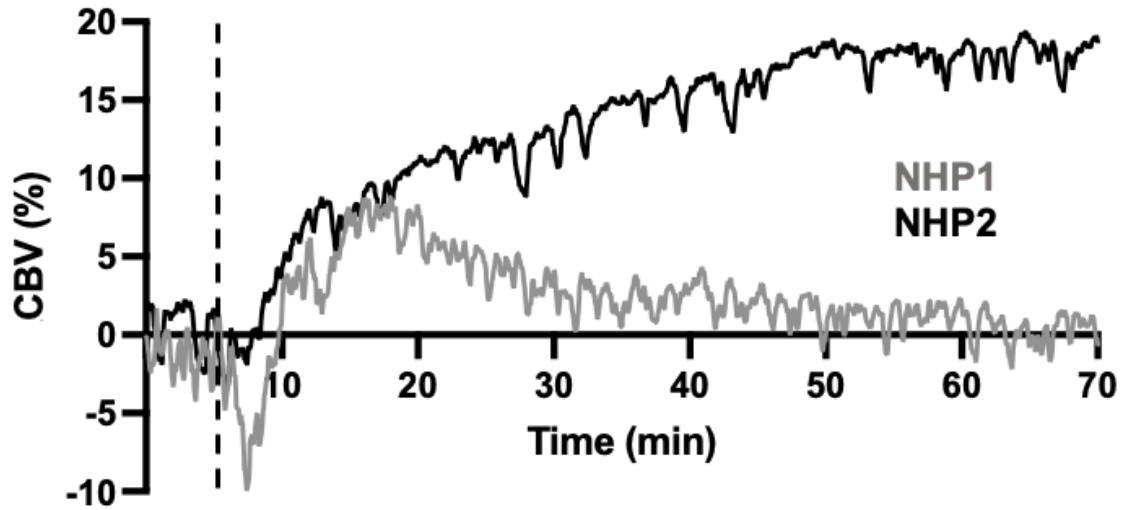

**Figure S2:** Individual NHP CBV profiles of the whole brain from the two lisuride scans, highlighting different patterns beyond acute lisuride injection between the NHP.

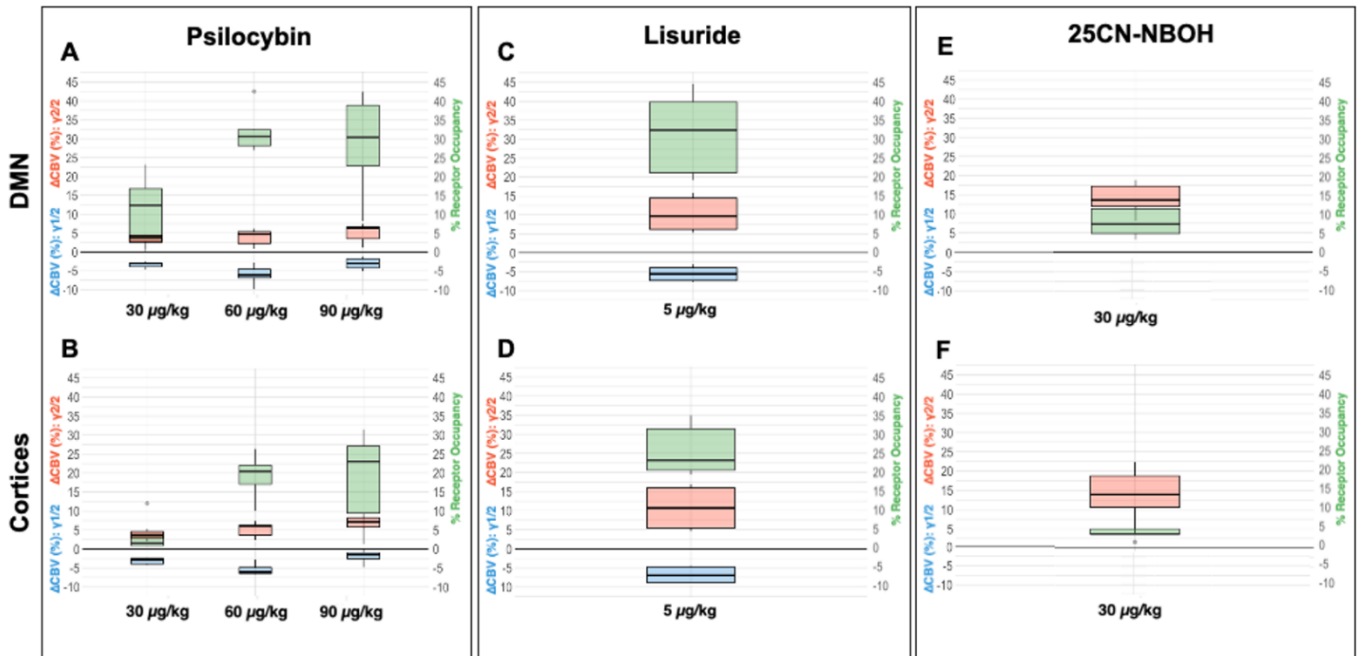

**Figure S3:** Occupancy (green) and DCBV (%) changes from  $\gamma_1$  (blue) and  $\gamma_2$  (red) for Psilocybin (A, B), Lisuride (C, D), and 25CN-NBOH (E, F). DMN (top row) is combined values across the ACC, PCC, and Precuneus. Cortices (bottom row) are combined values across Motor, Occipital, and Sensory cortices. Occupancy values below 0% were omitted. After thresholding in the Cortices, total datapoints for Psilocybin 30, 90 $\mu\text{g}/\text{kg}$  and Lisuride are N=6 for both CBV and %O; total datapoints for psilocybin 60 $\mu\text{g}/\text{kg}$  for %O are N=6, for CBV N=9; total datapoints for 25CN-NBOH are N=9 for CBV, N=6 for %O. After thresholding in the DMN, all total datapoints were the same as Cortices, with the exception of 25CN-NBOH N=3 for %O.

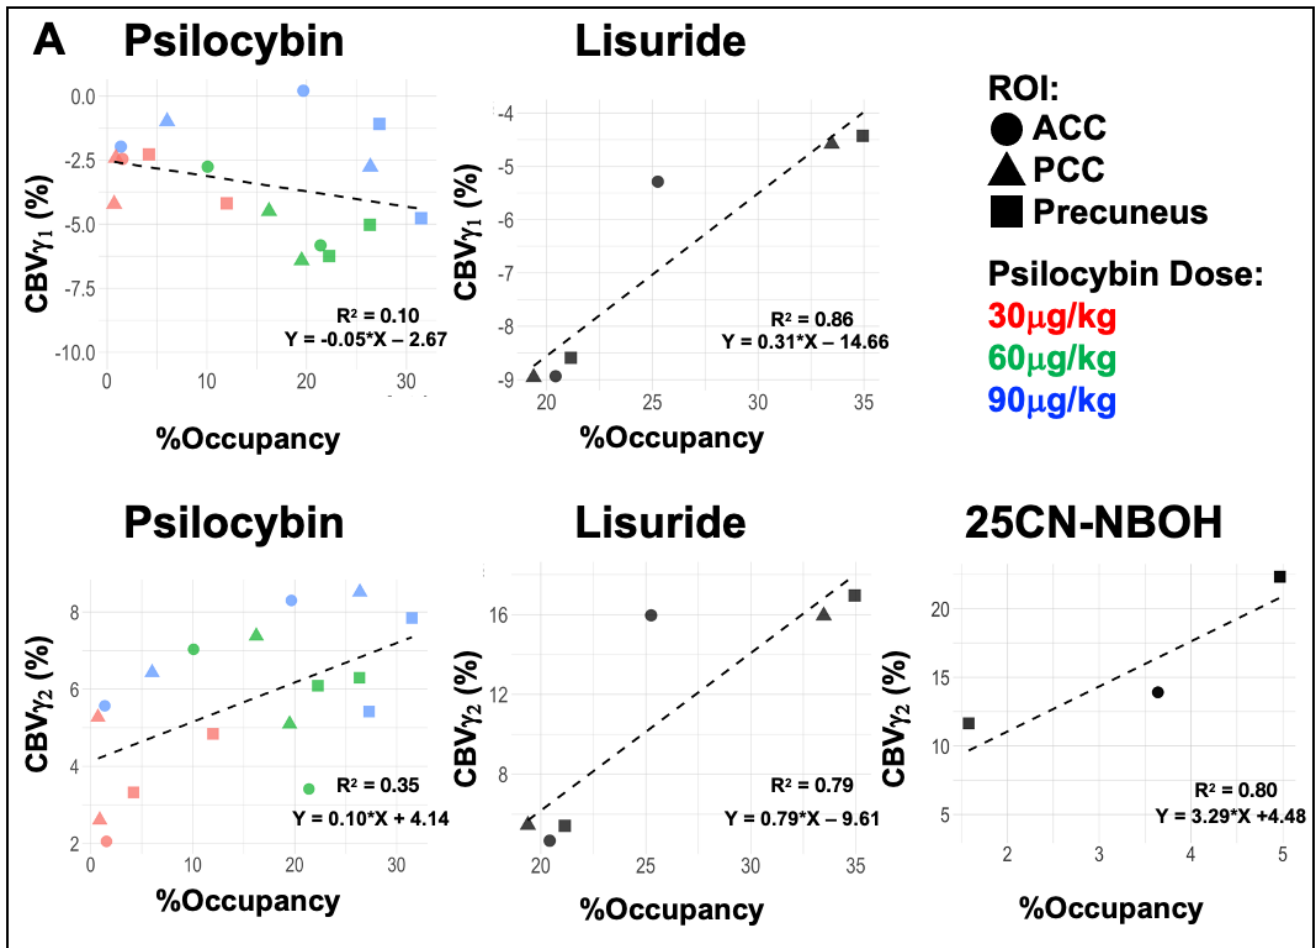

**Figure S4:** Assessment for trends between receptor occupancy (%) and CBV (%) changes for  $\gamma_1$  and  $\gamma_2$  in DMN regions. Datapoints with occupancies below 0% were excluded. Total number of datapoints: Psilocybin N=17; Lisuride N=6; 25CN-NBOH N=3

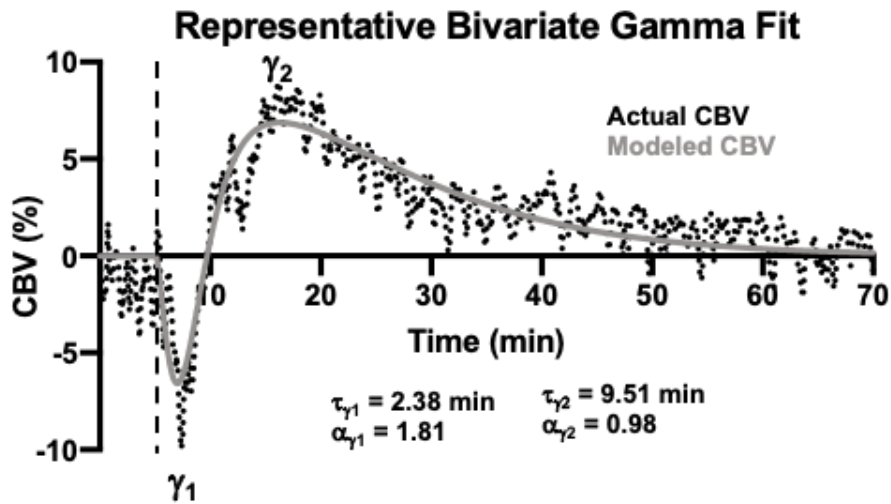

**Figure S5:** Representative model fit of an NHP with biphasic temporal CBV profile (black dots) and  $\gamma_1$ ,  $\gamma_2$  fits (grey line) for NHP1. Fits were performed on the raw fMRI signal, converted to percent difference relative to pre-injection signal, and detrended.  $\tau$  and  $\alpha$  represent time to peak change and shape for each function, respectively Conversion to relative changes in CBV based on previously used conversion methods (see MRI, pHMRI Data Reconstruction and Processing in the main text). Dashed line represents the point of drug injection.

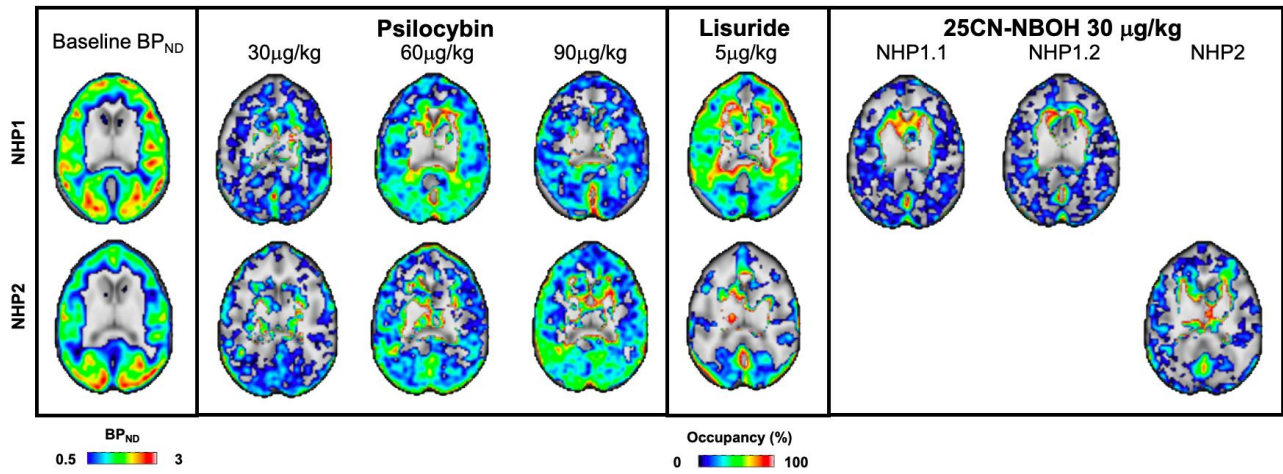

Figure S6: Occupancy maps derived for individual NHP to indicate sensitivity from across animals for each drug challenge scan. In the 25CN-NBOH group, NHP1.1 and NHP1.2 correspond to the drug challenge scan 1 and scan 2, respectively, that NHP1 underwent.



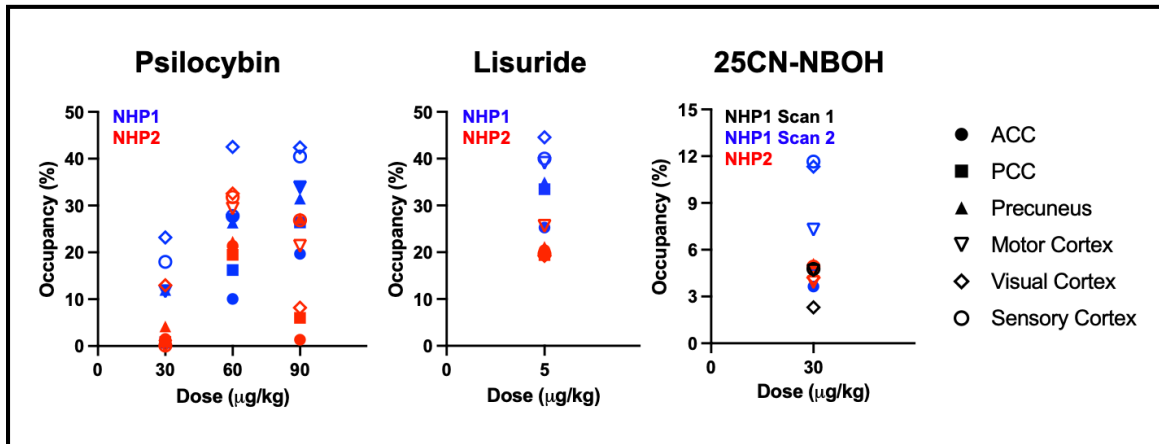

Figure S7: Occupancy maps derived for individual NHP to indicate sensitivity from across animals for each drug challenge scan. In the 25CN-NBOH group, NHP1.1 and NHP1.2 correspond to the drug challenge scan 1 and scan 2, respectively, that NHP1 underwent.

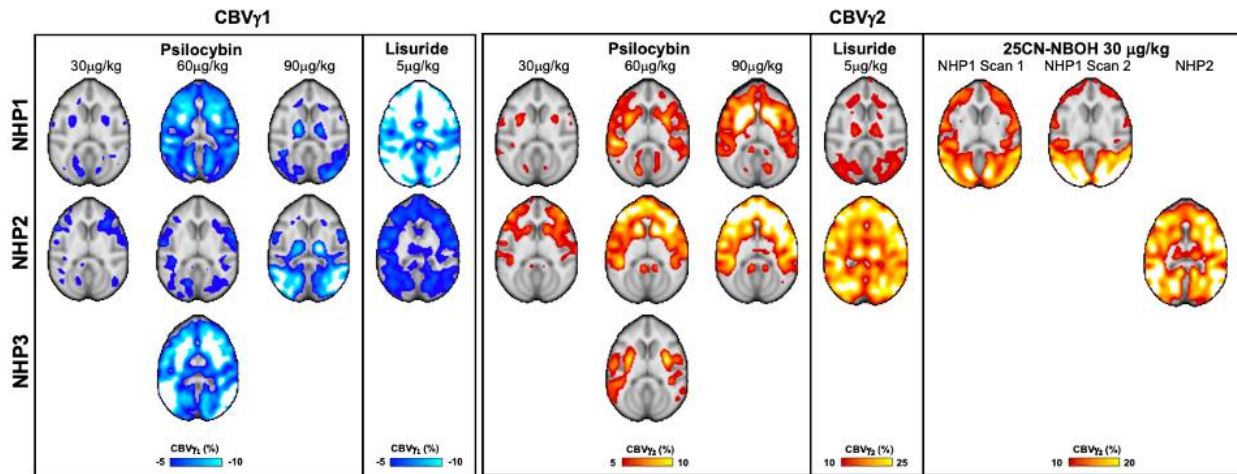

Figure S8: CBV maps derived for individual NHP to indicate sensitivity from across animals for each drug challenge scan. In the 25CN-NBOH group, NHP1.1 and NHP1.2 correspond to the drug challenge scan 1 and scan 2, respectively, that NHP1 underwent. NHP3 is not included in Figure 2 as it did not have a paired PET scan but is included for here for transparency.

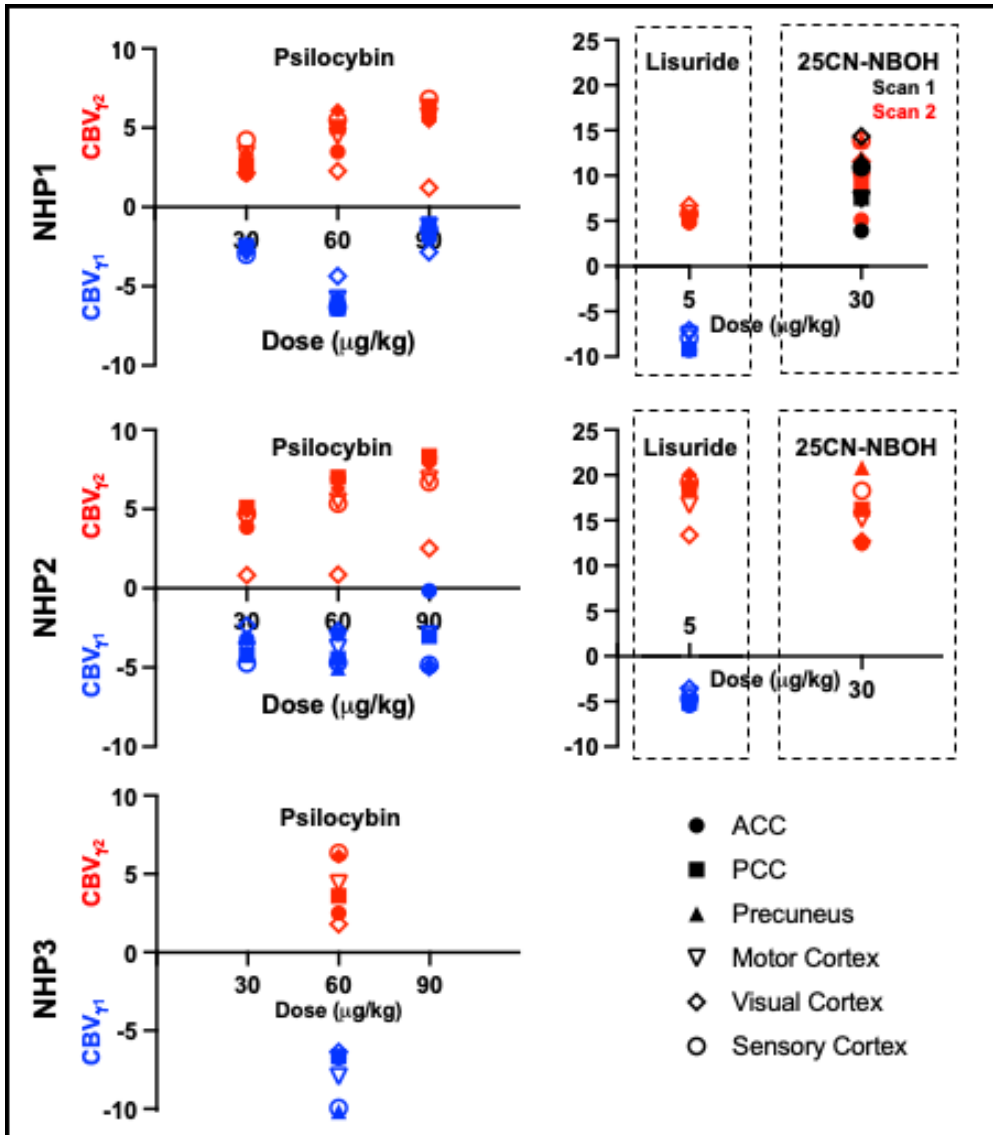

Figure S9: ROI-specific derived CBV derived for individual NHP to indicate sensitivity from across animals for each drug challenge scan. In the 25CN-NBOH group, NHP1.1 and NHP1.2 correspond to the drug challenge scan 1 and scan 2, respectively, that NHP1 underwent. NHP3 is not included in Figure 2 as it did not have a paired PET scan but is included for here for transparency.
